# Supplementary material for: Genome-wide association study and genomic selection of flax powdery mildew in Xinjiang Province
Source: Front Plant Sci. 2024 May 28;15:1403276. doi: 10.3389/fpls.2024.1403276 (PMC11165360; doi:10.3389/fpls.2024.1403276)
Supplement: Supplementary file 6 [file Table_2.xlsx]

## Sheet: Sheet1
Table S2 | The DI of PM resistance in 200 flax accessions
number	original name	2017	2019	2020	2021	mean
C1	Atalante	63.871	55	58	63	59.9677
C2	Noralta	73.1707	80	75	91	79.7927
C3	Novelty	61.3793	62	60	63	61.5948
C4	Res. x Hoshangabad (C.I. 19 x C.I.140)	63.5	52	58	65	59.625
C5	Linota	65.9459	73	63	62	65.9865
C6	Sel. of N.D.R. 114	48.5714	75	46	76	61.3929
C7	Sagino	61.6667	72	67	68	67.1667
C8	noname	81.6667	82	85	90	84.6667
C9	Tammes Type 5	77.2973	60	78	78	73.3243
C10	Sel. 176 x (19 x 112)	82.8571	80	81	82	81.4643
C11	Lusatia	52.7273	53	50	55	52.6818
C12	Hollandia	66.1538	50	67	70	63.2885
C13	Artemida	84	77	84	85	82.5
C14	A-93	88	85	86	90	87.25
C15	L. 270-68	92	88	92	90	90.5
C16	VNIIL-180	90	87	91	93	90.25
C17	VNIIL-1104	42.1053	74	45	66	56.7763
C18	VNIIL-519	94	80	90	92	89
C19	VNIIL-918	70	75	71	73	72.25
C20	VNIIL-725	61.6667	65	64	66	64.1667
C21	VNIIL-3531	54.7059	63	55	60	58.1765
C22	Evelin	85.1613	82	85.1613	86	84.5806
C23	Laura	86	78	86	92	85.5
C24	Hermes	88	81	88	90	86.75
C25	Ariane	87.0968	83	87.0968	86	85.7984
C26	Raisa	87.0968	83	87.0968	85	85.5484
C27	Escalina	89.0323	86	89.0323	91	88.7661
C28	Marina	87.0968	85	87.0968	86	86.2984
C29	Korostenskij 3	90	77	90	87	86
C30	Natasja	84	80	84	83	82.75
C31	Domtar Selection	88	82	88	90	87
C32	de metcha 1-3-6 Vilm	53.5294	67	52	59	57.8824
C33	Tammes Type 2	70	77	71	74	73
C34	Tammes Type 12	85	86	86	78	83.75
C35	Buda 80	78.0645	88	75	81	80.5161
C36	Atlas (fiber)	70	83	71	78	75.5
C37	Z 11637	74.8387	75	74.8387	76	75.1694
C38	Mapun	80	82	80	81	80.75
C39	Erythree	55.2941	75	55.2941	68	63.3971
C40	Common	58.8571	80	58.8571	76	68.4286
C41	411704 Fiber	80.6452	77	80.6452	74	78.0726
C42	Tammes Pale Blue	82	79	80	81	80.5
C43	Belinka	84	83	84	85	84
C44	1270	86	85	84	87	85.5
C45	Svetoch mutation	90.9677	81	90.9677	86	87.2339
C46	L-93-2	79.3548	77	76	79	77.8387
C47	L-8709-5-10	83.2258	71	82	81	79.3065
C48	L-140-16	58	82	58	68	66.5
C49	Torzhokij 4	90	85	86	86	86.75
C50	Novotorzhskij	86	81	82	87	84
C51	Aleksim	85.1613	85	81	98	87.2903
C52	AR-2	90	87	88	94	89.75
C53	G-1781-4-18	87.0968	88	85	88	87.0242
C54	B-14	82	82	81	81	81.5
C55	L-1120	82	86	85	84	84.25
C56	G-1847-4-1	76	83	72	83	78.5
C57	Verchnevolzhkij	84	82	81	89	84
C58	Belochka	85.1613	75	87	86	83.2903
C59	VNIIL-5520	83.2258	80	81	84	82.0565
C60	VNIIL-742	62	85	66	69	70.5
C61	VNIIL-776	76.7742	78	77	69	75.1935
C62	VNIIL-409	68.2353	82	71	78	74.8088
C63	VNIIL-492	84	84	84	79	82.75
C64	TR 35141	75.4839	77	76	78	76.621
C65	Tajga	84	80	81	86	82.75
C66	Line 548-01	83.2258	78	88	91	85.0565
C67	Line 629-01	83.2258	80	85	86	83.5565
C68	Line 657-01	86	80	82	85	83.25
C69	Pskovski 2976	57.4194	77	51	78	65.8548
C70	G 2063-5-10	83.2258	75	89	79	81.5565
C71	L-500004-2-84	81.2903	75	79	74	77.3226
C72	L-60016-3-87	82.5806	72	88	78	80.1452
C73	Mures	78	65	71	69	70.75
C74	L-41	84	71	83	89	81.75
C75	Concurent	81.2903	77	86	80	81.0726
C76	China 1	83.2258	80	86	85	83.5565
C77	China 2	78.7097	78	72	79	76.9274
C78	China 4	80	75	85	77	79.25
C79	China 6	80	80	78	80	79.5
C80	Viking	84	83	81	88	84
C81	Sel. C.I. 19-47 Pale Blue	78.125	60	79	69	71.5312
C82	No. Dak. No. 40,013	80	71	73	76	75
C83	Sel. of Minn. 281	81.2903	82	82	83	82.0726
C84	VNIIL-6148	76.7742	71	77	78	75.6935
C85	Macbeth	46.9231	67	46.9231	71	57.9615
C86	Crepitam Tabor	76.7742	77	75	78	76.6935
C87	CDC Bethune-14	76	30	76	66	62
C88	Diane	87.0968	78	87.0968	89	85.2984
C89	K-1339	70.9677	80	72	77	74.9919
C90	Argos	83.2258	82	85	96	86.5565
C91	NOVA ROSSISK SELECTI	72.9032	75	72.9032	88	77.2016
C92	RABA 0189	22.7586	25	22.7586	26	24.1293
C93	TAMMES TYPE 12	74.8387	81	77	96	82.2097
C94	Xie Liebo	74	80	72	71	74.25
C95	Arcata	83.2258	81	83.2258	97	86.1129
C96	38	81.2903	79	88	86	83.5726
C97	CIli 452	84	80	81	96	85.25
C98	CIli 642	52.9032	65	55	53	56.4758
C99	CIli 1407	80	77	75	74	76.5
C100	CIli 1464	82.67	79	83	81	81.4175
C101	CIli 1490	57.4194	80	52	79	67.1048
C102	CIli 1519	69.6774	73	65	74	70.4194
C103	BELADI Y 6903	72.9032	76	66	79	73.4758
C104	URUGUAY 36/48	86	74	82	86	82
C105	CIli 1617	85.1613	75	81	93	83.5403
C106	CIli 1679	46.2069	35	44	39	41.0517
C107	Q9903	50.9677	65	50.9677	62	57.2339
C108	Peynau	88	78	89	83	84.5
C109	CIli 1918	80	66	80	76	75.5
C110	CIli 1919	49.0323	62	41	61	53.2581
C111	CIli 1924	37.3333	35	32	37	35.3333
C112	CIli 2038	88	75	82	89	83.5
C113	CIli 2047	88	88	81	89	86.5
C114	ALSEE	48	50	42	42	45.5
C115	MESSENIAS	36.6667	62	33	38	42.4167
C116	OLEIFERA	72.9032	75	71	76	73.7258
C117	41	82	80	82	84	82
C118	MARTIN	56	78	56	76	66.5
C119	DIADEM	70.9677	81	65	69	71.4919
C120	Q0415	18.6667	16	18.6667	11	16.0833
C121	62/125-4	54.1935	60	51	51	54.0484
C122	TARAGUI	54	77	54	76	65.25
C123	TIMBU	30	45	30	40	36.25
C124	HINDI	76	75	76	80	76.75
C125	GRAND TURKISTAN 4	87.0968	88	88	78	85.2742
C126	CYPRUS	83.2258	77	81	86	81.8065
C127	MALABRIGO 1.7	74	75	75	73	74.25
C128	Olayozon	72	75	70	73	72.5
C129	Tverta	70	80	70	74	73.5
C130	ARANDAS	76	78	77	79	77.5
C131	R-111	70	82	71	81	76
C132	K-y	74	84	73	84	78.75
C133	CULBERT M3P3	42.6667	43	42.6667	50	44.5833
C134	CONCURRENT	74.8387	62	60	72	67.2097
C135	HERRA	84	80	80	85	82.25
C136	ROYAL	77.4194	81	77.4194	86	80.4597
C137	CIli 897	66	72	66	79	70.75
C138	CIli 908	76	80	76	80	78
C139	CIli 946	83.2258	80	83.2258	83	82.3629
C140	REDSON	52	63	52	72	59.75
C141	TOMAGAON	79.3548	77	61	75	73.0887
C142	MINVANO	61.2903	72	65	73	67.8226
C143	BURKE	65.1613	65	66	76	68.0403
C144	CIli 1185	74	61	72	80	71.75
C145	CIli 1474	88	82	80	89	84.75
C146	UNRYU	63.2258	71	63.2258	79	69.1129
C147	WELLS	85.1613	79	81	90	83.7903
C148	CIli 1525	52	69	55	59	58.75
C149	RECOLTE NO 0196	70.9677	74	72	72	72.2419
C150	RIJKI	54	71	55	79	64.75
C151	CIli 1555	60.5882	66	78	72	69.1471
C152	BENVENUTO REAL	56	74	55	69	63.5
C153	CIli 1581	65.1613	70	66	78	69.7903
C154	QUERANDI	64	73	67	79	70.75
C155	CIli 1596	50.9677	80	53	88	67.9919
C156	LUOMAL MAATIAIS YELLOW	67.0968	78	68	79	73.0242
C157	LINAZA	50.3704	45	52	55	50.5926
C158	BETA 201	83.2258	85	82	89	84.8065
C159	CIli 1749	47.6923	45	41	55	47.1731
C160	CIli 1819	83.2258	77	88	74	80.5565
C161	Longya10	75.5556	30	65	54	56.1389
C162	CIli 1832	31.3333	35	38	37	35.3333
C163	BASIN	50	69	51	58	57
C164	N 39/B LA PLATA	86	83	88	92	87.25
C165	CREE	70.9677	73	77	74	73.7419
C166	CIli 1966	72.9032	65	77	78	73.2258
C167	CIli 1976	50.9677	55	48	59	53.2419
C168	CIli 2197	90	54	97	96	84.25
C169	CIli 2225	70	72	75	74	72.75
C170	BERNBURGER OEL FASERLEIN	89.0323	73	76	88	81.5081
C171	TEXTILAK	76	75	76	76	75.75
C172	CIli 2264	69.0323	67	69.0323	70	68.7661
C173	CIli 2473	72	75	72	76	73.75
C174	CIli 2575	87.0968	88	81	88	86.0242
C175	CIli 2719	89.0323	90	85	94	89.5081
C176	CIli 2734	88	78	88	87	85.25
C177	STENDEZ	72.9032	73	71	75	72.9758
C178	WALSH	54	50	55	57	54
C179	VICTORY	78	60	73	74	71.25
C180	DOLGUNETZ	51.7647	74	56	68	62.4412
C181	CIli 1676	79.3548	50	60	69	64.5887
C182	CIli 1683	78	78	73	78	76.75
C183	CIli 1689	74	72	71	78	73.75
C184	CIli 1761	83.2258	69	83.2258	72	76.8629
C185	CIli 1777	69.0323	70	69.0323	73	70.2661
C186	WADA	64	72	64	78	69.5
C187	PERCELLO	57.33	75	57.33	76	66.415
C188	LIRAL PRINCE	72.9032	81	77	72	75.7258
C189	CASCADE	67.0968	80	67.0968	79	73.2984
C190	MARSIC	77	75	71	71	73.5
C191	CIli 2802	44.2857	70	44.2857	59	54.3929
C192	ANTARES	74	75	74	78	75.25
C193	HINU	37.3333	25	37.3333	38	34.4167
C194	CHANA	46.4	45	46.4	50	46.95
C195	MAROS	70.9677	70	70.9677	72	70.9839
C196	H2	70	75	70	72	71.75
C197	York	83.2258	70	83.2258	66	75.6129
C198	TJK04-20	23.75	55	25	37	35.1875
C199	TJK04-72	46.8966	55	47	50	49.7241
C200	TJK04-348	52	47	55	57	52.75
